# Supplementary material for: Molecular basis for the fold organization and sarcomeric targeting of the muscle atrogin MuRF1
Source: PubMed Central journal article supplement (PMC3971405; doi:10.1098/rsob.130172), 2014-03-26
Supplement: rsob130172supp1.pdf [file rsob130172supp1.pdf]

## SUPPLEMENTARY MATERIALS

### Molecular basis for the fold organization and sarcomeric targeting of the muscle atrogin MuRF1

Barbara Franke<sup>1</sup>, Alexander Gasch<sup>2</sup>, Dayté Rodriguez<sup>3</sup>, Mohamed Chami<sup>4</sup>, Muzamil M. Khan<sup>5</sup>, Rüdiger Rudolf<sup>5,6</sup>, Jaelyn Bibby<sup>1</sup>, Akira Hanashima<sup>2</sup>, Julijus Bogomolovas<sup>2</sup>, Eleonore von Castelmur<sup>1</sup>, Daniel J. Rigden<sup>1</sup>, Isabel Uson<sup>3</sup>, Siegfried Labeit<sup>2</sup>, Olga Mayans<sup>1\*</sup>

#### Figure S1: Knobs-into-hole packing of the crystallographic dimers of MuRF1-CC.

Residues are colored according to their position in the heptad-repeat as identified by the program SOCKET (1). Namely, *a* (red), *d* (green), *e* and *g* (blue) of the heptad repeats. The analysis indicated that in the AC dimer 18 residues exhibited a conventional CC packing (7,7,4 repeat), whilst the BD dimer had 25 residues in CC arrangement (7,7,7,4 repeat). This shows that the packing of chains in both palindromic arms exhibits a slight anisometry.

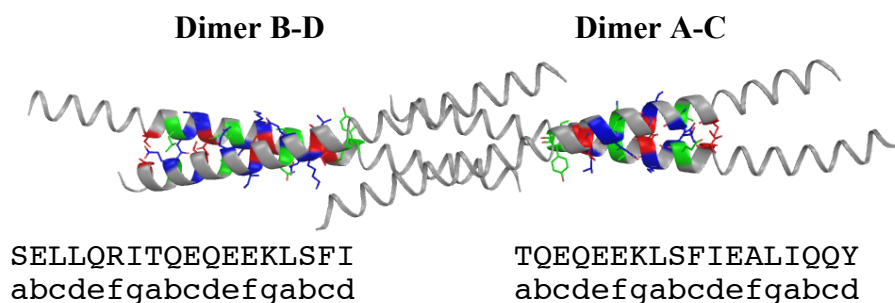

#### Figure S2: *Ab initio* models of the C-terminal fraction of the helical domain of MuRF1 (residues 214-327).

**a)** Top model generated using Quark (2); **b)** Superimposition of a family of 9 top models calculated in Quark; **c)** top model calculated in Rosetta (3), representative centroid of 150 models; **d)** Superimposition of Quark (rainbow) and Rosetta (grey) models. Despite a different identification of the C-terminus of the long helix  $\alpha_1$ , the three-helical bundle topology of Quark and Rosetta models is strikingly similar.

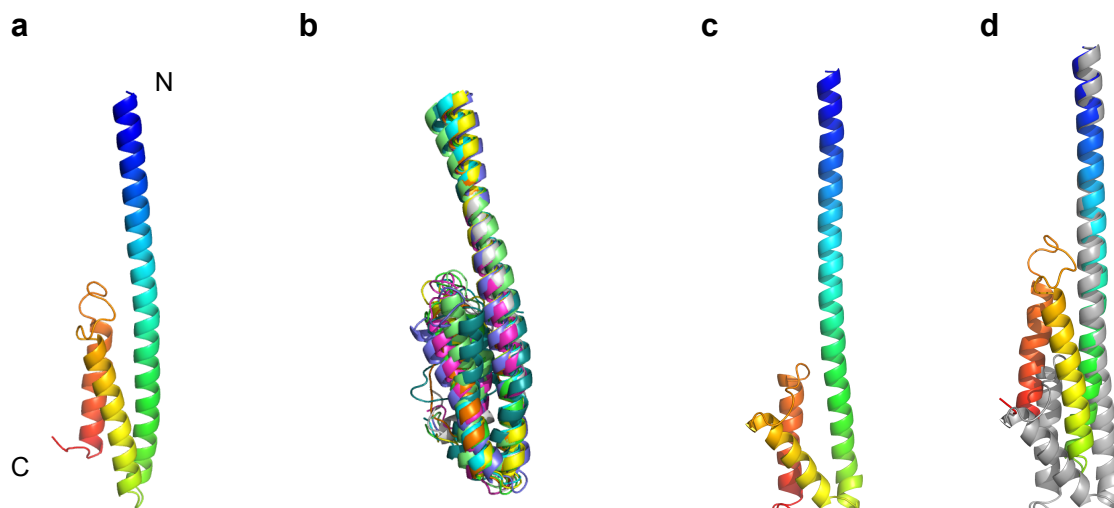

### Fig S3: SEC-MALLS measurements of MuRF1 component fractions

The average molecular mass per volume unit (red) and the differential refractive index (blue) are shown. The theoretical mass of monomeric (continuous line) and dimeric (dashed line) states is indicated.

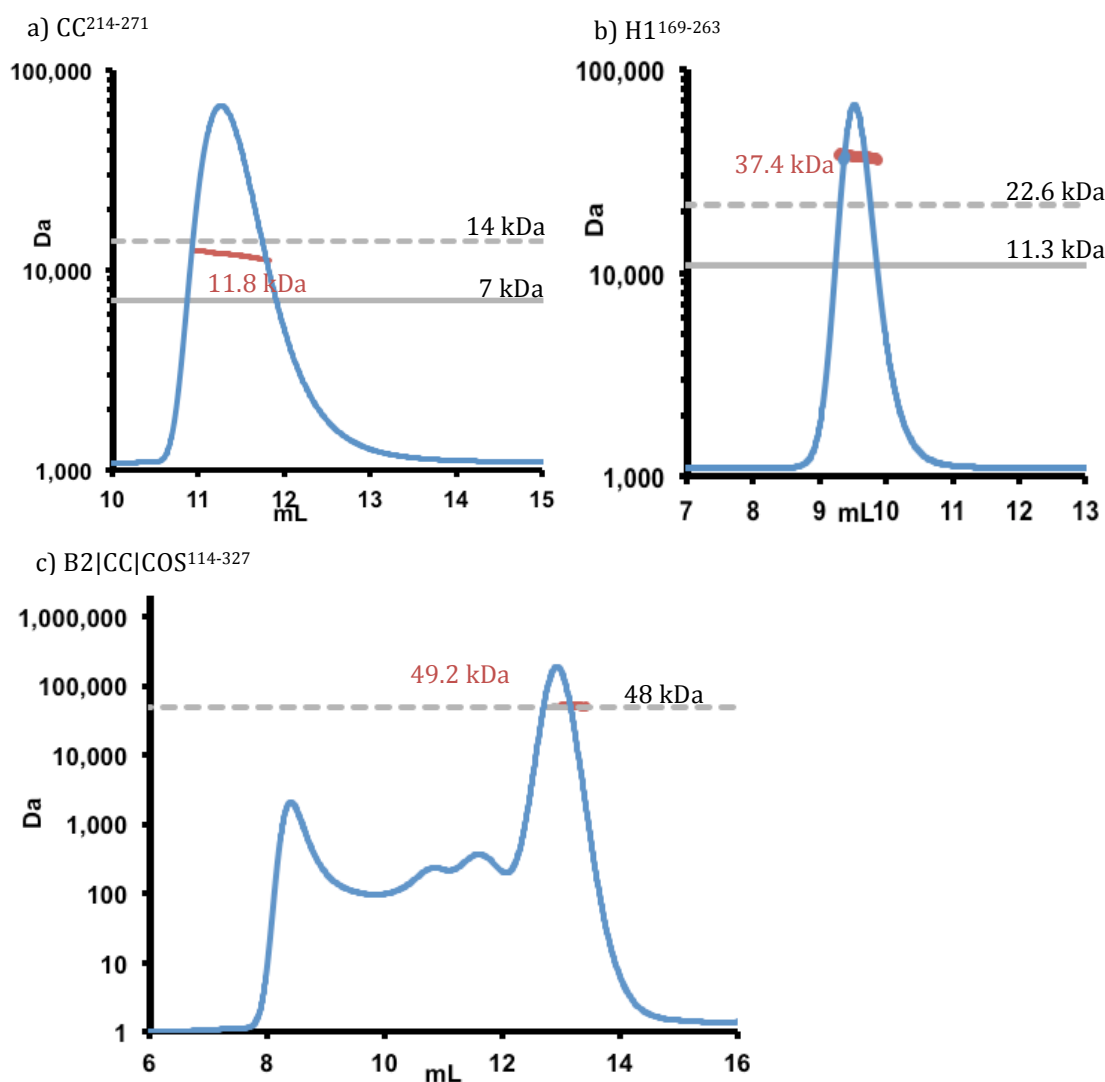

Fig S4: Comparison of helix packing in the crystallographic structure of MuRF1<sup>CC</sup> (blue) and the Quark *ab initio* model that includes the COS-box (orange). In the MuRF1<sup>CC</sup> crystallographic tetramer, helices arranged themselves along the same interfaces as those occupied by the COS-box  $\alpha$ -hairpin in the *ab initio* models. This suggests that in the crystallographic assembly, amphipathic helices pack to best satisfy native interfaces.

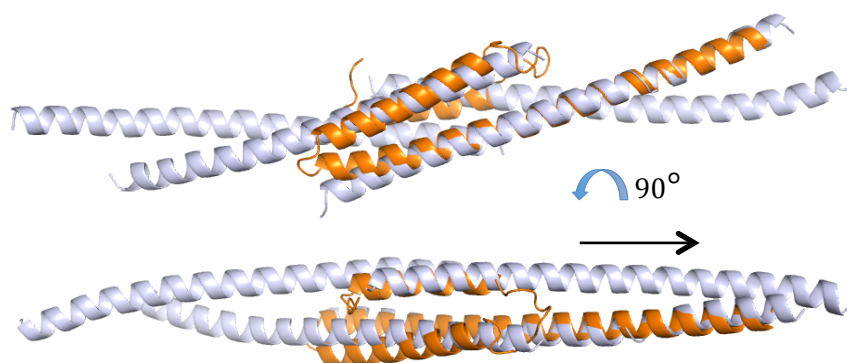

### Fig S5: Monitoring of MuRF1 H1 and COS-box complexation by gel filtration

Individual and complexed samples were run on an analytical Superdex 200 10/300 GL column (GE Healthcare) in 20mM Tris pH 7.5, 200mM NaCl. The H1/COS complex was formed by mixing the components in a 1:1 ratio overnight at 4°C in the buffer above. **a.** Chromatograms. The amounts of sample injected onto the column were: H1<sup>169-263</sup>/COS<sup>261-330</sup>, 0.1μM of each component in 600μL; H1<sup>169-263</sup>, 0.1μM in 175μL; COS<sup>261-330</sup>, 0.1μM in 350μL. Fractions used in the accompanying SDS-PAGE gels are marked on the chromatogram (boxes). The gels (**b-d**) show equivalent fractions (collected every 250μL) from each run. In the presence of H1 (but not in isolation), the COS-box co-elutes at low volumes of exclusion.

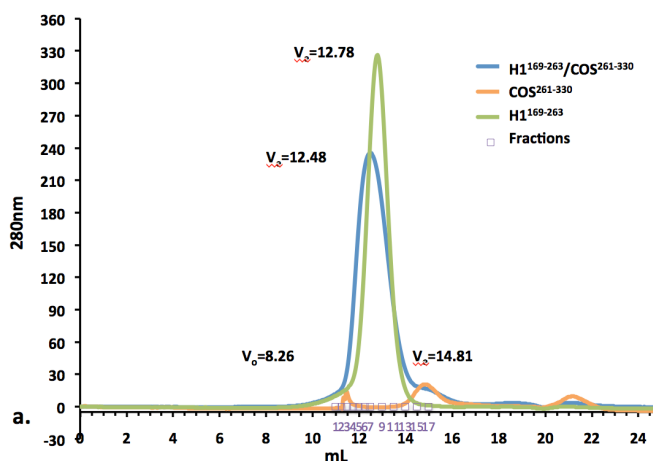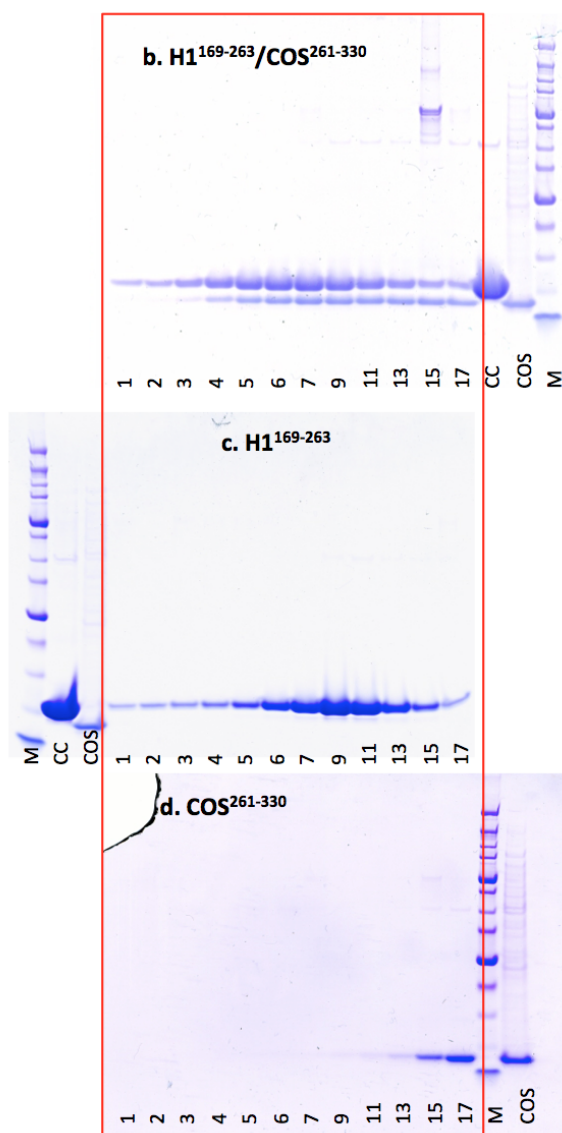

### Fig S6: GFP targeting in vivo

In vivo targeting of transiently expressed GFP protein in transfected skeletal muscle. Depicted are confocal slices of neuromuscular junctions (A, pretzel-like structures), the corresponding GFP-expressing fibers (B), and the overlay of both (C). In the latter, neuromuscular junctions are in red and GFP signals in green. Arrowheads indicate AChR-positive puncta. Note that contrary to COS-GFP (Fig. 6d-g in main text), GFP does not exhibit any enrichment at the neuromuscular junctions or in sarcomeric striations.

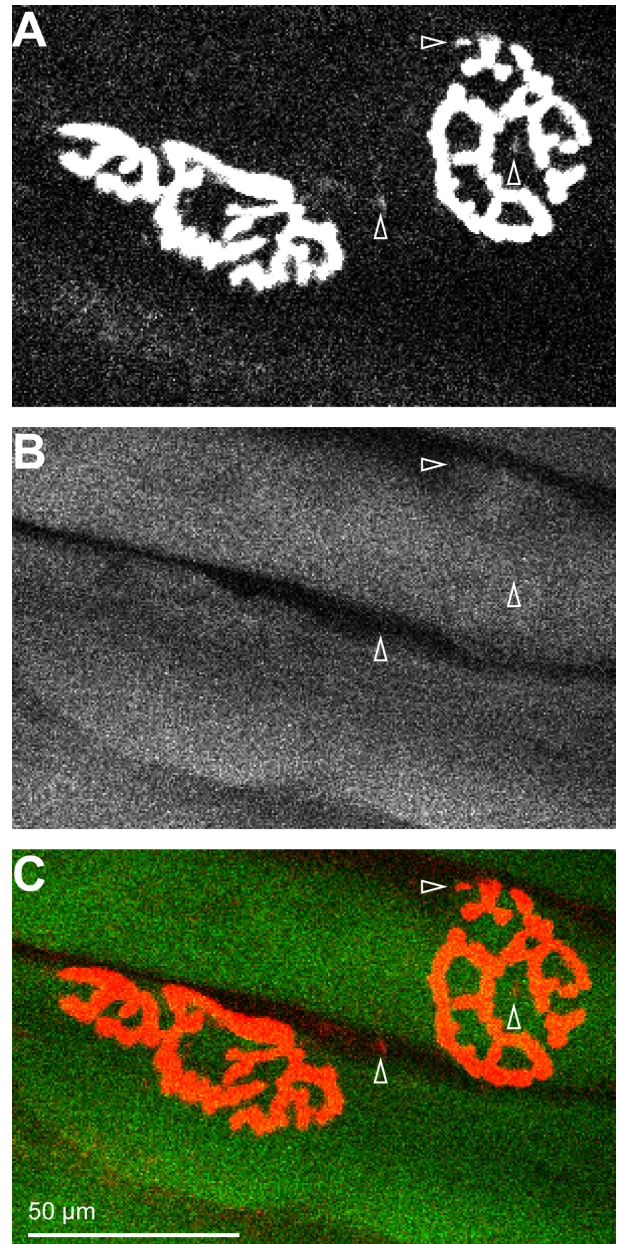

### References

1. Walshaw J, Woolfson DN (2001) Socket: a program for identifying and analysing coiled-coil motifs within protein structures. *J Mol Biol* 307: 1427-1450
2. Xu D, Zhang Y (2012) Ab initio protein structure assembly using continuous structure fragments and optimized knowledge-based force field. *Proteins* 80: 1715-1735.
3. Simons KT, Kooperberg C, Huang E, Baker D (1997) Assembly of protein tertiary structures from fragments with similar local sequences using simulated annealing and Bayesian scoring functions. *J Mol Biol* 268: 209-225.
